# Supplementary material for: Recent inner ear specialization for high-speed hunting in cheetahs
Source: PubMed Central journal article supplement (PMC5797172; doi:10.1038/s41598-018-20198-3), 2018-02-02
Supplement: 41598_2018_20198_MOESM1_ESM.pdf [file 41598_2018_20198_MOESM1_ESM.pdf]

**Supporting Information for**

Recent inner ear specialization for high-speed hunting in cheetahs

Camille Grohé, Beatrice Lee, and John J. Flynn

**Supplementary Figure 1.** Consensus phylogeny of Felidae. Node numbers correspond to divergence age estimates in Supplementary Table 1. Stratigraphic occurrences are 23.03-20 Ma (Oligo-Miocene to early Miocene) for *Proailurus lemanensis* and 2.58-0.126 Ma (early-middle Pleistocene) for *Acinonyx pardinensis*. Bony labyrinth representations not to scale.

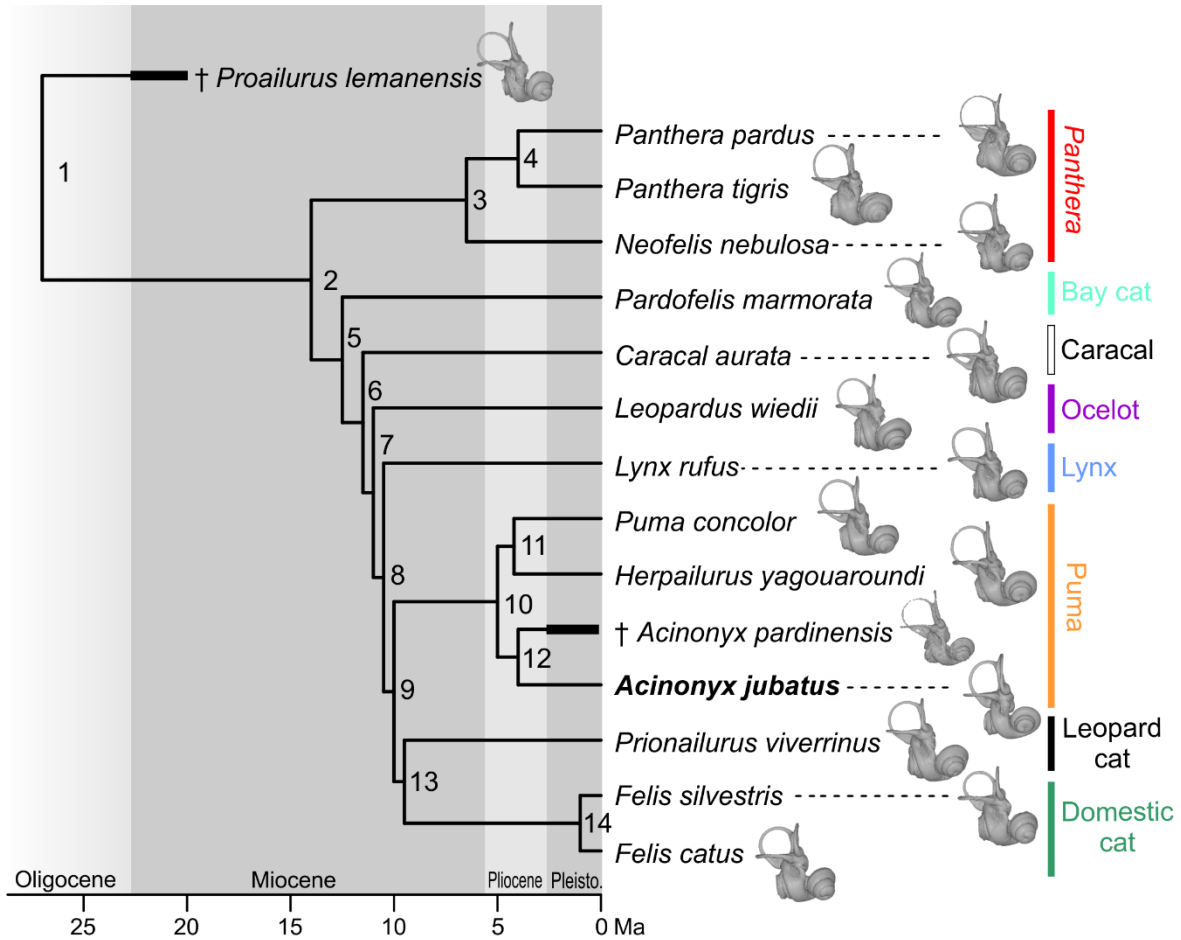

**Supplementary Figure 2.** Visualization of shape changes in felids for the negative and positive values of PC1. Bony labyrinth in lateral (**a**), dorsal (**b**), posterior (**c**) and anterior (**d**) views (associated with Fig. 1c). Orientation of the bony labyrinth: ant, anterior; dors, dorsal; lat, lateral; post, posterior; ventr, ventral. Arrows highlight shape features discussed in the text.

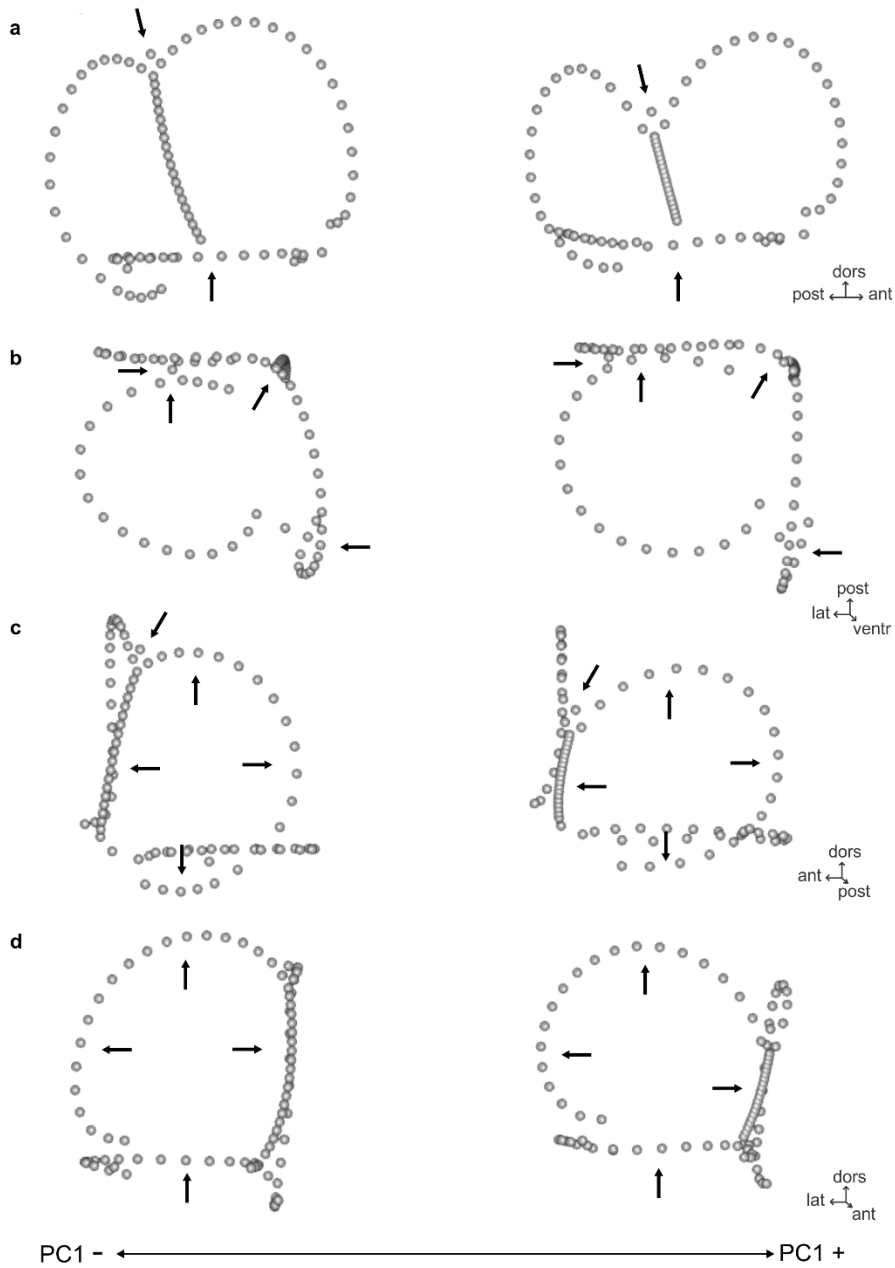

**Supplementary Figure 3.** Visualization of shape changes in felids for the negative and positive values of PC2. Bony labyrinth in lateroposterior view (associated with Fig. 1c). Orientation of the bony labyrinth: ant, anterior; dors, dorsal; lat, lateral. Arrows highlight shape features discussed in the text.

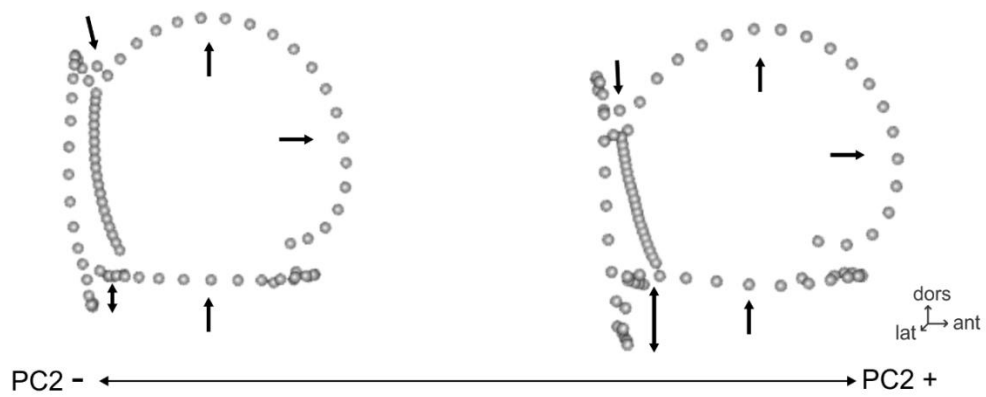

**Supplementary Table 1.** Divergence age estimates for felids (associated with Supplementary Fig. 1).

| Node number (this study) | Node number <sup>1</sup> | Age of nodes (Ma) | References | Descending nodes (NA is used when no OTUs descend from the node) |
|--------------------------|--------------------------|-------------------|------------|------------------------------------------------------------------|
| 1                        | 103                      | <b>27</b>         | 2, 3       | † <i>Proailurus lemanensis</i> -Felidae                          |
| 2                        | 135                      | <b>14</b>         | 3          | Felinae                                                          |
| 3                        | 170                      | <b>6.5</b>        | 4          | <i>Panthera-Neofelis</i>                                         |
| 4                        | 172                      | <b>4</b>          | 3          | <i>Panthera</i>                                                  |
| 5                        | 136                      | <b>12.5</b>       | 3, 4       | NA                                                               |
| 6                        | 137                      | <b>11.5</b>       | 4          | NA                                                               |
| 7                        | 138                      | <b>11</b>         | 4          | NA                                                               |
| 8                        | 139                      | <b>10.5</b>       | 4          | NA                                                               |
| 9                        | 140                      | <b>10</b>         | 4          | NA                                                               |
| 10                       | 152                      | <b>5</b>          | 4          | <i>Puma-Acinonyx-Miracinonyx</i>                                 |
| 11                       | 156                      | <b>4.2</b>        | 4          | <i>Herpailurus yagouaroundi</i>                                  |
| 12                       | 155                      | <b>4</b>          | 5          | <i>Acinonyx jubatus</i> /† <i>A. pardinensis</i>                 |
| 13                       | 141                      | <b>9.5</b>        | 4          | NA                                                               |
| 14                       | 147                      | <b>1</b>          | 4          | <i>Felis catus</i> / <i>F. silvestris</i>                        |

### Reference list

1. Piras, P. *et al.* Bite of the cats: relationships between functional integration and mechanical performance as revealed by mandible geometry. *Syst. Biol.* **62**, 878–900 (2013).
2. Peigné, S. *Proailurus*, l'un des plus anciens Felidae (Carnivora) d'Eurasie: systématique et évolution. *Bull. Soc. Hist. Nat. Toulouse* **135**, 125–134 (1999).
3. Werdelin, L., Yamaguchi, N., Johnson, W. E. & O'Brien, S. J. Phylogeny and evolution of cats. In: *Biology and Conservation of Wild Felids* (eds MacDonald, D. W. & Loveridge, A. J.) 59–82 (Oxford University Press, New York, 2010).

4. Johnson, W. E. *et al.* The Late Miocene radiation of modern Felidae: a genetic assessment. *Science* **311**, 73–77 (2006).
5. Werdelin, L. & Peigné, S. Carnivora. In: *Cenozoic Mammals of Africa* (eds Werdelin, L. & Sanders, W. J.) 603–657 (University of California Press, Berkeley and London, 2010).

**Supplementary Table 2.** List of the specimens analysed, and associated CT data information. Abbreviations for specimens are: AMNH, American Museum of Natural History, New York; M- and MO-, AMNH Mammalogy collection; FM, AMNH Fossil Mammals collection; F:AM, AMNH Frick Fossil Mammals collection; CCEC, Centre de Conservation et d'Étude des Collections, Musée des confluences, Lyon, France; MNHN F, Fossils from the Muséum d'Histoire Naturelle of Paris, France; SG-, collection of Saint-Gérard-le-Puy. Subspecies are based on the geographic origin of specimens for *Acinonyx jubatus*<sup>3</sup>. Extinct species are marked by the dagger symbol (†). Abbreviations:  $\mu\text{m}$ , micrometer; kV, kilovolt; mA, milliampere; L, left; R, right.

| Species                             | Common name           | Specimen number | Stage | Voxel size ( $\mu\text{m}$ ) | Voltage (kV) | Amperage (mA) | Inner ear | Geographical origin                               | Sex     |
|-------------------------------------|-----------------------|-----------------|-------|------------------------------|--------------|---------------|-----------|---------------------------------------------------|---------|
| <i>Acinonyx jubatus</i>             | Cheetah               | AMNH FM 145070  | adult | 0.04004                      | 120          | 180           | L         | unknown                                           | unknown |
| <i>Acinonyx jubatus</i>             | Cheetah               | AMNH FM 145071  | adult | 0.08042                      | 140          | 170           | R         | unknown                                           | unknown |
| <i>Acinonyx jubatus soemeringii</i> | Northeast cheetah     | AMNH M-90255    | adult | 0.06788                      | 140          | 170           | R         | 60 miles South of Harrar, Ethiopia                | male    |
| <i>Acinonyx jubatus raineyi</i>     | Tanzanian cheetah     | AMNH M-27897    | adult | 0.08224                      | 130          | 170           | R         | Nyamusi, Nyanza Province, Kenya                   | male    |
| <i>Acinonyx jubatus raineyi</i>     | Tanzanian cheetah     | AMNH M-161139   | adult | 0.06591                      | 130          | 170           | R         | 25 miles east Ngorongoro Crater, Arusha, Tanzania | male    |
| <i>Acinonyx jubatus jubatus</i>     | South African cheetah | AMNH M-119655   | adult | 0.0646                       | 130          | 170           | R         | Tambara District, Mozambique                      | female  |

|                                 |                       |                  |          |         |     |     |   |                                         |         |
|---------------------------------|-----------------------|------------------|----------|---------|-----|-----|---|-----------------------------------------|---------|
| <i>Acinonyx jubatus jubatus</i> | South African cheetah | AMNH M-80618     | juvenile | 0.06476 | 130 | 170 | R | Chitau, Bié Province, Angola            | female  |
| † <i>Acinonyx pardinensis</i>   | 'Giant' cheetah       | CCEC-161825      | adult    | 0.05    | 180 | 30  | R | Saint Vallier, France                   | unknown |
| <i>Caracal aurata</i>           | Golden cat            | AMNH M-51996     | adult    | 0.05662 | 130 | 170 | R | Kenge, Democratic Republic of the Congo | male    |
| <i>Felis silvestris lybica</i>  | African wildcat       | AMNH M-81233     | adult    | 0.04872 | 130 | 170 | R | Ethiopia                                | male    |
| <i>Felis catus</i>              | Domestic cat          | AMNH F:AM 145069 | juvenile | 0.05077 | 120 | 160 | R |                                         | unknown |
| <i>Leopardus wiedii</i>         | Margay                | AMNH M-95085     | adult    | 0.05372 | 130 | 170 | R | Santarém, Pará state, Brazil            | male    |
| <i>Lynx rufus</i>               | Bobcat                | AMNH M-24225     | adult    | 0.05683 | 140 | 170 | R | Brownsville, Cameron County, Texas      | unknown |
| <i>Neofelis nebulosa</i>        | Clouded leopard       | AMNH M-22919     | adult    | 0.09764 | 170 | 300 | R | Central Park zoo, New York City         | unknown |
| <i>Panthera pardus</i>          | Leopard               | AMNH M-113745    | adult    | 0.136   | 160 | 170 | R | Madras, India                           | male    |
| <i>Panthera tigris</i>          | Tiger                 | AMNH M-45519     | adult    | 0.12025 | 160 | 150 | R | Futsing, Fujian Province, China         | male    |
| <i>Pardofelis marmorata</i>     | Marbled cat           | AMNH M-102844    | adult    | 0.0484  | 130 | 170 | R | Sumatra, Indonesia                      | male    |
| † <i>Proailurus lemanensis</i>  |                       | MNHN F-SG3509a   | adult    | 0.05551 | 125 | 310 | R | Saint-Gerand-Le-Puy, France             | unknown |
| <i>Prionailurus viverrinus</i>  | Fishing cat           | AMNH M-102691    | adult    | 0.05662 | 130 | 170 | R | Java, Indonesia                         | male    |
| <i>Puma concolor</i>            | Puma                  | AMNH MO-6677     | adult    | 0.095   | 160 | 180 | R | Mascota, Jalisco state, Mexico          | male    |



|                                    |            |                  |       |         |     |     |   |                                     |      |
|------------------------------------|------------|------------------|-------|---------|-----|-----|---|-------------------------------------|------|
| <i>Herpailurus<br/>yagouarondi</i> | Jaguarundi | AMNH M-<br>24853 | adult | 0.05419 | 120 | 150 | R | Escuinapa, Sinaloa<br>state, Mexico | male |
|------------------------------------|------------|------------------|-------|---------|-----|-----|---|-------------------------------------|------|

---

**Supplementary Table 3.** Volumetric measurements of the bony labyrinths and body mass estimation of felid specimens based on the following equation<sup>52</sup>:  $\log_{10}BM = (\log_{10}CBL - 1.723)/0.345$ , with BM, Body Mass (kg) and CBL, CondylloBasal Length (mm). Vol, Volume (mm<sup>3</sup>); BL, Bony Labyrinth; VS, Vestibular System; CS, Cochlear System; % Vol VS= (Vol BL/Vol VS) × 100. BM is in grams. Extinct species are marked by the dagger symbol (†). See Methods for details.

| Species                              | Specimen number  | Vol BL | Vol VS | Vol CS | % Vol VS | CBL    | BM      |
|--------------------------------------|------------------|--------|--------|--------|----------|--------|---------|
| <i>Acinonyx jubatus</i>              | AMNH FM 145070   | 109.1  | 44.83  | 64.27  | 41.1     | 153.6  | 22037.5 |
| <i>Acinonyx jubatus</i>              | AMNH FM 145071   | 98.78  | 43.14  | 55.64  | 43.7     | 152    | 21378.7 |
| <i>Acinonyx jubatus soemerringii</i> | AMNH M-90255     | 124.13 | 48.17  | 75.96  | 38.8     | 135.4  | 15289.8 |
| <i>Acinonyx jubatus raineyi</i>      | AMNH M-27897     | 117.17 | 44.82  | 72.35  | 38.2     | 192.7  | 42524.8 |
| <i>Acinonyx jubatus raineyi</i>      | AMNH M-161139    | 120.07 | 47.06  | 73.01  | 39.2     | 166.93 | 28049.5 |
| <i>Acinonyx jubatus jubatus</i>      | AMNH M-119655    | 126.52 | 48.06  | 78.46  | 38       | 168.6  | 28870.7 |
| <i>Acinonyx jubatus jubatus</i>      | AMNH M-80618     | 127.64 | 51.35  | 76.29  | 40.2     | 103.1  | 6939.52 |
| <i>Caracal aurata</i>                | AMNH M-51996     | 96.68  | 26.78  | 69.9   | 27.7     | 99     | 6169.46 |
| <i>Felis catus</i>                   | AMNH F:AM 145069 | 57.15  | 19.04  | 38.11  | 33.3     | 61     | 1515.89 |
| <i>Felis silvestris</i>              | AMNH M-81233     | 71.75  | 21.68  | 50.07  | 30.2     | 88     | 4385.09 |
| <i>Herpailurus yagouaroundi</i>      | AMNH M-24853     | 62.53  | 22.36  | 40.17  | 35.8     | 99.69  | 6294.92 |
| <i>Leopardus wiedii</i>              | AMNH M-95085     | 73.79  | 19.56  | 54.23  | 26.5     | 89     | 4531.09 |
| <i>Lynx rufus</i>                    | AMNH M-24225     | 99.75  | 34.88  | 64.87  | 35       | 120    | 10774.8 |
| <i>Neofelis nebulosa</i>             | AMNH M-22919     | 105.81 | 34.97  | 70.84  | 33       | 157.8  | 23829.9 |
| <i>Panthera pardus</i>               | AMNH M-113745    | 161.22 | 51.49  | 109.73 | 31.9     | 161.36 | 25421.8 |
| <i>Panthera tigris</i>               | AMNH M-45519     | 241.99 | 79.14  | 162.85 | 32.7     | 272    | 115483  |
| <i>Pardofelis marmorata</i>          | AMNH M-102844    | 66.74  | 21.23  | 45.51  | 31.8     | 95     | 5474.31 |
| <i>Prionailurus viverrinus</i>       | AMNH M-102691    | 94.68  | 27.15  | 67.53  | 28.7     | 117.6  | 10162   |
| <i>Puma concolor</i>                 | AMNH MO-6677     | 149.86 | 47.76  | 102.1  | 31.9     | 167.7  | 28426.2 |
| † <i>Acinonyx pardinensis</i>        | CCEC-161825      | 124.41 | 43.18  | 81.23  | 34.7     | 165    | 27119.8 |
| † <i>Proailurus lemanensis</i>       | MNHN F-SG3509a   | 62.04  | 20.16  | 41.88  | 32.5     | 143    | 17912.2 |

**Supplementary Table 4.** Log-transformed Vol VS (Volume of the Vestibular System in mm<sup>3</sup>) and BM (Body mass in grams) used for the least squares regression model (see Methods) and associated residuals. The model has the following equation:  $\log_{10}\text{Vol VS} = 0.36192 \times \log_{10}\text{BM} + 0.01989$ .  $R^2 = 0.772$ ; Standard error = 0.05455; p-value =  $1.627 \times 10^{-5}$ . Extinct species are marked by the dagger symbol (†).

|                                 | <b>log<sub>10</sub>BM</b> | <b>log<sub>10</sub> Vol VS</b> | <b>Residuals</b> |
|---------------------------------|---------------------------|--------------------------------|------------------|
| <i>Acinonyx jubatus</i>         | 4.3194                    | 1.6694                         | 0.0862           |
| <i>Caracal aurata</i>           | 3.7902                    | 1.4278                         | 0.0362           |
| <i>Felis catus</i>              | 3.1807                    | 1.2797                         | 0.1086           |
| <i>Felis silvestris</i>         | 3.642                     | 1.3361                         | -0.0019          |
| <i>Herpailurus yagouaroundi</i> | 3.799                     | 1.3495                         | -0.0453          |
| <i>Leopardus wiedii</i>         | 3.6562                    | 1.2914                         | -0.0518          |
| <i>Lynx rufus</i>               | 4.0324                    | 1.5426                         | 0.0633           |
| <i>Neofelis nebulosa</i>        | 4.3771                    | 1.5437                         | -0.0603          |
| <i>Panthera pardus</i>          | 4.4052                    | 1.7117                         | 0.0975           |
| <i>Panthera tigris</i>          | 5.0625                    | 1.8984                         | 0.0463           |
| <i>Pardofelis marmorata</i>     | 3.7383                    | 1.3269                         | -0.0459          |
| <i>Prionailurus viverrinus</i>  | 4.007                     | 1.4338                         | -0.0363          |
| <i>Puma concolor</i>            | 4.4537                    | 1.6791                         | 0.0473           |
| † <i>Acinonyx pardinensis</i>   | 4.4333                    | 1.6353                         | 0.0109           |
| † <i>Proailurus lemanensis</i>  | 4.2531                    | 1.3045                         | -0.2547          |

**Supplementary Table 5.** Definition of the 3D landmarks and semilandmarks in the geometric morphometric analysis. SC, Semicircular Canal.

| <b>No</b> | <b>Type</b>   | <b>Definition</b>                                  |
|-----------|---------------|----------------------------------------------------|
| 1         | Landmark      | Bifurcation point of the lateral and anterior SC   |
| 2         | Landmark      | Bifurcation point of the lateral and posterior SC  |
| 3         | Landmark      | Bifurcation point of the anterior and posterior SC |
| 4 to 23   | Semilandmarks | Curve placed at the center of the anterior SC      |
| 24 to 43  | Semilandmarks | Curve placed at the center of the lateral SC       |
| 44 to 63  | Semilandmarks | Curve placed at the center of the posterior SC     |
| 64 to 83  | Semilandmarks | Curve placed at the center of the common crus      |

**Supplementary Table 6.** Linear and angular measurements of the semicircular canals of felid specimens. L, length; W, Width; ASC, Anterior Semicircular Canal; LSC, Lateral Semicircular Canal; PSC, Posterior Semicircular Canal. Extinct species are marked by the dagger symbol (†). See Methods for details.

| Species                              | Specimen number  | ASC<br>L | ASC<br>W | LSC<br>L | LSC<br>W | PSC<br>L | PSC<br>W | Angle<br>ASC/LSC | Angle<br>LSC/PSC | Angle<br>ASC/PSC |
|--------------------------------------|------------------|----------|----------|----------|----------|----------|----------|------------------|------------------|------------------|
| <i>Acinonyx jubatus</i>              | AMNH FM 145070   | 4.97     | 5.28     | 4.39     | 4.14     | 5.04     | 4.5      | 88.63            | 96.56            | 113.41           |
| <i>Acinonyx jubatus</i>              | AMNH FM 145071   | 5.15     | 5.35     | 4.28     | 4.18     | 5.54     | 4.64     | 88.62            | 93.78            | 109.48           |
| <i>Acinonyx jubatus soemerringii</i> | AMNH M-90255     | 5.03     | 5.44     | 4.41     | 4.3      | 5.07     | 4.44     | 90.67            | 96.4             | 111              |
| <i>Acinonyx jubatus raineyi</i>      | AMNH M-27897     | 5.23     | 5.36     | 4.56     | 4.41     | 5.21     | 4.53     | 88.93            | 92.69            | 111.37           |
| <i>Acinonyx jubatus raineyi</i>      | AMNH M-161139    | 5.53     | 5.53     | 4.61     | 4.24     | 5.37     | 4.67     | 90.76            | 92.61            | 112.17           |
| <i>Acinonyx jubatus jubatus</i>      | AMNH M-119655    | 5.25     | 5.34     | 4.64     | 4.48     | 5.22     | 4.86     | 88.97            | 91.04            | 109.15           |
| <i>Acinonyx jubatus jubatus</i>      | AMNH M-80618     | 5.29     | 5.31     | 4.29     | 4.63     | 5.46     | 4.76     | 91.91            | 90.41            | 113.67           |
| <i>Caracal aurata</i>                | AMNH M-51996     | 3.89     | 4.78     | 4.5      | 3.99     | 4.27     | 4.24     | 90.52            | 87.14            | 88.81            |
| <i>Felis catus</i>                   | AMNH F:AM 145069 | 2.86     | 3.77     | 3.47     | 3.54     | 3.1      | 3.37     | 90.44            | 95.91            | 89.55            |
| <i>Felis silvestris</i>              | AMNH M-81233     | 3.15     | 3.93     | 3.58     | 3.64     | 3.17     | 3.39     | 85.51            | 93.1             | 88.51            |
| <i>Herpailurus yagouaroundi</i>      | AMNH M-24853     | 3.7      | 4.14     | 3.21     | 3.99     | 4.15     | 4.16     | 89.19            | 91.32            | 93.48            |
| <i>Leopardus wiedii</i>              | AMNH M-95085     | 3.62     | 4.16     | 3.79     | 3.49     | 3.41     | 3.91     | 86.24            | 95.19            | 90.65            |
| <i>Lynx rufus</i>                    | AMNH M-24225     | 4.04     | 4.88     | 4.5      | 3.96     | 4.43     | 4.55     | 87               | 87.73            | 89.8             |
| <i>Neofelis nebulosa</i>             | AMNH M-22919     | 4.91     | 5.56     | 4.57     | 4.28     | 4.92     | 4.94     | 86.11            | 95.7             | 85.48            |
| <i>Panthera pardus</i>               | AMNH M-113745    | 5.45     | 6.14     | 5.21     | 5.3      | 5.01     | 5.68     | 89.42            | 84.76            | 89.27            |
| <i>Panthera tigris</i>               | AMNH M-45519     | 5.39     | 6.95     | 6.11     | 5.95     | 6.26     | 6.35     | 90.15            | 87.06            | 96.03            |
| <i>Pardofelis marmorata</i>          | AMNH M-102844    | 3.57     | 4.3      | 3.86     | 3.76     | 3.78     | 4.03     | 89.46            | 90.28            | 96.66            |
| <i>Prionailurus viverrinus</i>       | AMNH M-102691    | 3.98     | 4.26     | 3.83     | 3.66     | 3.93     | 4        | 90.67            | 93.48            | 89.96            |
| <i>Puma concolor</i>                 | AMNH MO-6677     | 4.93     | 5.96     | 5        | 4.69     | 5.42     | 5.46     | 90.21            | 93.17            | 92.73            |
| † <i>Acinonyx pardinensis</i>        | CCEC-161825      | 5.56     | 5.63     | 5.59     | 5.22     | 5.22     | 5.59     | 84.76            | 91.31            | 92.42            |
| † <i>Proailurus lemanensis</i>       | MNHN F-SG3509a   | 4.42     | 4.54     | 3.98     | 3.52     | 3.47     | 4.31     | 82.755           | 92.49            | 91.83            |
